# Supplementary material for: AlphaFill: enriching AlphaFold models with ligands and cofactors
Source: PubMed Central journal article supplement (PMC9911346; doi:10.1038/s41592-022-01685-y), 2022-11-24
Supplement: 41592_2022_1685_MOESM1_ESM.pdf [file 41592_2022_1685_MOESM1_ESM.pdf]

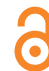

---

# AlphaFill: enriching AlphaFold models with ligands and cofactors

---

In the format provided by the authors and unedited

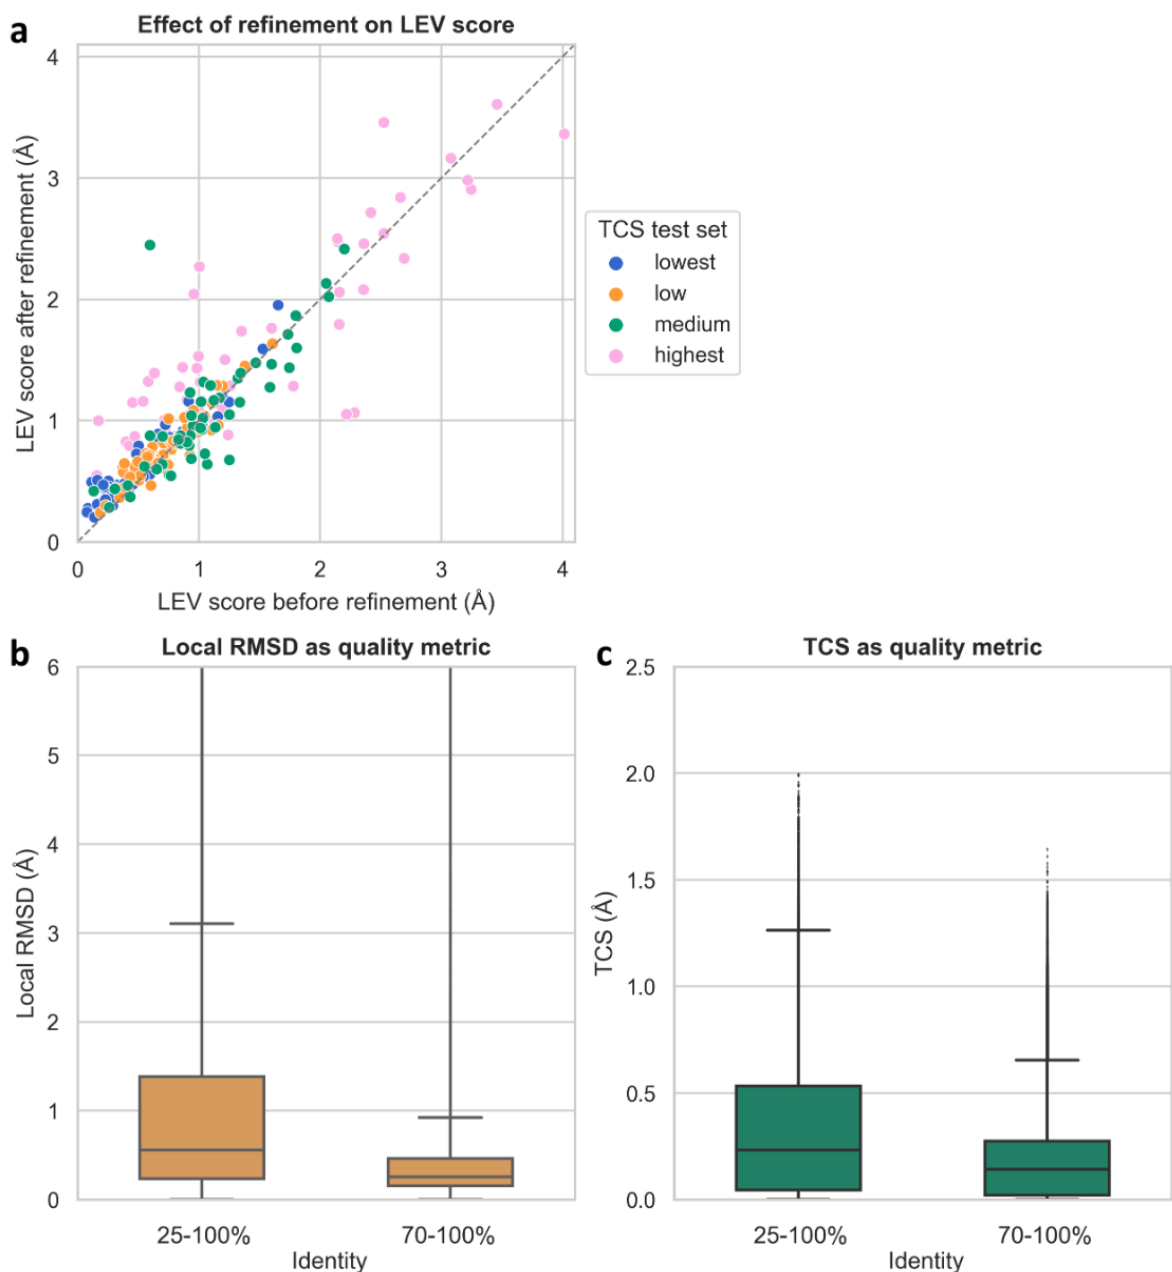

Supplemental Figure S1: **a** Comparison of the LEV score before and after energy minimisation for four subsets of the validation set ( $n = 50$  for each subset), illustrating that LEV score is not strongly affected for low(est) TCS, whereas high(er) initial TCS shows some changes upon refinement. **b** Local RMSD boxplots that were used to determine the cut-offs to annotate high, medium and low-confidence transplants. Boxes are based on 12,029,789 and 933,117 transplants and extend from first to third quartile with the median as the middle line. Whiskers extend to 1.5 times the inter-quartile range. Outliers are shown as individual points. 466,867 and 3,373 outliers not shown for clarity, maximum values are

107.4 Å and 44.4 Å. **c** TCS boxplots that were used to determine the cut-offs to annotate high, medium and low-confidence transplants. Boxes are based on 12,029,789 and 933,117 transplants and extend from first to third quartile with the median as the middle line. Whiskers extend to 1.5 times the inter-quartile range. Outliers are shown as individual points.

**αfill** NKI Research | Biochemistry | Perrakis group  
Home Structures Compounds Model About Download

### P29373

Ligand RET (RETINAL) with identifier R optimized with Yasara

Structure file <https://alphafill.eu/v1/aff/P29373-F1/optimized/A,R>

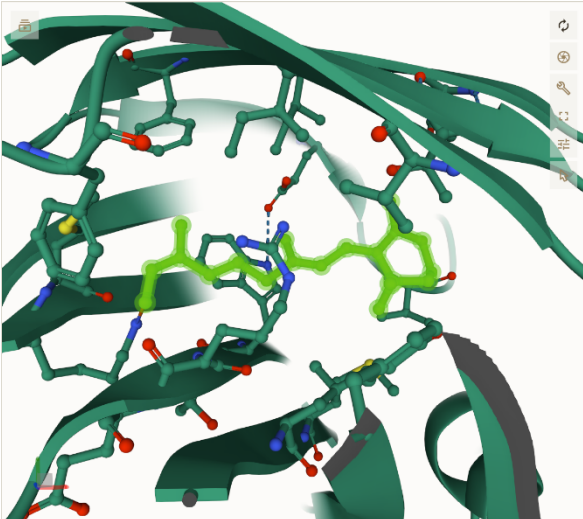

|                            | Original | Optimised |
|----------------------------|----------|-----------|
| Transplant clash score (Å) | 0.99     | 0.29      |

Supplemental Figure S2: Screenshot after using the “optimise” function for retinal (RET) in cellular retinoic acid-binding protein 2 (AF-P29373). The TCS score before and after refinement is shown, along with a ligand-focused view in Mol\*. The optimised complex can be downloaded.
